# Supplementary material for: Evidence that regulation of intramembrane proteolysis is mediated by substrate gating during sporulation in Bacillus subtilis
Source: PubMed Central journal article supplement (PMC6242693; doi:10.1371/journal.pgen.1007753), 2018-11-07
Supplement: pgen.1007753.s017.pdf [file pgen.1007753.s017.pdf]

**S3 Table. Oligonucleotide primers used in this study**

| <b>Primers</b> | <b>Sequence*</b>                                             |
|----------------|--------------------------------------------------------------|
| oDR078         | gccGGATCCtattgtatagttcatccatgcc                              |
| oDR079         | gcgCTCGAGgggtccggaatgag                                      |
| oDR106         | ggcAAGCTTAcataaggaggaaactactatgaataaatggctcgacctatc          |
| oDR481         | gcgGCAATTGcgctgctctgcttctgcctgc                              |
| oDR482         | cggCTCGAGgtagggcagaagcagttcctc                               |
| oDR594         | gccGAATTCgggaaatgaaataagcctgattgacg                          |
| oDR595         | cggCTCGAGttcccccttcgcttctccg                                 |
| oCR599         | gcgAAGCTTAcataaggaggaaactactatggtagacaggtgttttcgcagc         |
| oCR600         | cgcGCTAGCttcccccttcgcttctccgct                               |
| oCR601         | cgcGCTAGCAtggtttcaaaaggcgaagaactgt                           |
| oCR603         | gcgAAGCTTAcataaggaggaaactactatgaataaatggctcgacctat           |
| oCR604         | cgcGCTAGCtattgtatagttcatccatgccatg                           |
| oCR605         | cgcGCATGCTtattcccccttcgcttctccgct                            |
| oCR606         | cgcGCATGCTtactataaagtctgcatgccaag                            |
| oCR619         | cggCTCGAGattcgtccgcttatcgcaag                                |
| oCR620         | cggCTCGAGctccctgttttccgtaatacc                               |
| oCR621         | cggCTCGAGgtgccttgcgatattcctc                                 |
| oFR48          | gaagggtaccagcggatgt                                          |
| oFR49          | ctgagcgaggagcagaaatcgggcattcactact                           |
| oFR50          | gttgaccagtgctccctggcaagctgactgccgga                          |
| oFR51          | gaatggaccaagagtgacgg                                         |
| oFR58          | gagcggataacaattaagcttacataaggaggaaactactatgagtcacagagcagatga |
| oFR59          | ttagctgcatcgagctagcttattcaaatgaaatcacc                       |
| oFR62          | cggACTAGTAcataaggaggaaactactatggagcctattttattattggg          |
| oFR66          | gccGCATGCTaaatgataaattgctaatgacgactaa                        |
| oFR72          | gccCTCGAGttgccgatgataagctgc                                  |
| oFR73          | gccGCTAGCActgtaatgtagcgaccg                                  |
| oFR77          | gccCTCGAGgggtccggagttcaaaaggcgaagaactg                       |
| oFR78          | gccGGATCCtactataaagtctgcatgcc                                |
| oFR83          | ggcGGATCCTTActcaagctccctgttttccgta                           |
| oFR84          | ggcAAGCTTAcataaggaggaaactactatgaataaatggctcgacctatc          |
| oCB038         | gaatcaagcgttttttgcgcccggctggcggaacggctgaagtgggaag            |
| oCB039         | cttccactcgaccgttccgccagccggcagcaaaaaaacgccttgattc            |

\* Capital letters indicate restriction endonuclease sites and underlined letters indicate mutated bases
