# Supplementary material for: Evidence that regulation of intramembrane proteolysis is mediated by substrate gating during sporulation in Bacillus subtilis
Source: PLOS journal article supplement (doi:10.1371/journal.pgen.1007753), 2018-11-07
Supplement: S1 (10.1371/journal.pgen.1007753.s001) [file journal.pgen.1007753.s001]

## **SUPPLEMENTAL INFORMATION**

### **Evidence that regulation of intramembrane proteolysis is mediated by substrate gating during sporulation in *Bacillus subtilis***

Fernando H. Ramírez-Guadiana, Christopher D. A. Rodrigues, Kathleen A. Marquis, Nathalie Campo, Rocío del Carmen Barajas-Ornelas, Kelly Brock, Debora S. Marks, Andrew C. Kruse, David Z. Rudner

#### **This PDF file includes:**

Supplemental Methods

## S1 Methods. Plasmids and strains construction.

**pKM190** [*spoIVFB-yfp (spec)*] (single crossover integration) was generated in a two-way ligation with an *MfeI-XhoI* PCR product containing the 3' end of the *spoIVFB* gene (oligonucleotide primers oDR481 + oDR482 and pDR004 (*spoIVF* operon) DNA as template) and pKL183 cut with *EcoRI* and *XhoI*. pKL183 (Lemon & Grossman 2000) is a single crossover integration vector containing the *yfp* gene.

**pKM261** [*ycgO::PspoIVF-spoIVFB(E44Q)-yfp (erm)*] was generated in a three-way ligation with a *HindIII-XhoI* PCR product containing *spoIVFB(E44Q)* (oligonucleotide primers oDR106 + oDR482 and pDR019 DNA as template), a *XhoI-BamHI* PCR product contain the *yfp* gene (oligonucleotide primers oDR78 + oDR79 and pKL183 as template), and pKM259 cut with *HindIII* and *BamHI*. pKM259 [*ycgO::PspoIVF (erm)*] was generated in a two-way ligation with an *EcoRI-HindIII* fragment containing the *PspoIVF* promoter from pDR077 and pKM084 cut with *EcoRI* and *HindIII*. pKM084 [*ycgO::erm*] is an ectopic integration vector for double crossover integration at the *ycgO* locus (KAM and DZR, unpublished)

**pKM266** [*spoIIIC-cfp (cat)*] (single crossover integration) was generated in a two-way ligation with an *EcoRI-XhoI* PCR product containing the 3' end of the *spoIIIC* (oligonucleotide primers oDR594 + oDR595 and pSK6 DNA as template) and pKM135 cut with *EcoRI* and *XhoI*. pKM135 is a single crossover integration vector containing the *mCFP* gene.

**pKM283** [*ycgO::PspoIVF-spoIVFB-yfp (erm)*] was generated in a two-way ligation with a *HindIII-XhoI* PCR product containin the *spoIVFB* gene (oligonucleotide primers oDR106 + oDR482 and pDR004 DNA as template) and pKM261 cut with *HindIII* and *XhoI*.

**pCR275** [*ycgO::Pspank-spoIVFB(E44Q)-yfp (erm)*] was generated in a two-way ligation with a *HindIII-NheI* PCR product containing *spoIVFB(E44Q)-yfp* (oligonucleotide primers oCR603 + oCR604 and pKM261 DNA as template) and pER65 cut with *HindIII-NheI*. pER65 [*ycgO::Pspank (lacI) (erm)*] is a double crossover vector, with an IPTG-inducible promoter, for ectopic integration at the *ycgO* locus (E. Riley and DZR, unpublished).

**pCR276** [*ycgO::Pspank-spoIVFB-yfp (erm)*] was generated in a two-way ligation with a *HindIII-NheI* PCR product containing *spoIVFB-yfp* (oligonucleotide primers oCR603 + oCR604 and pKM283 DNA as template) and pER065 cut with *HindIII-NheI*.

**pCR278** [*amyE::Pspank-pro-sigK-cfp (spec)*] was generated in a three-way ligation with a *HindIII-NheI* PCR product containing *pro-sigK* (oligonucleotide primers oCR599 + oCR600 and pDR012 (*amyE::pro-sigK (cat)*) DNA as template), an *NheI-SphI* PCR product containing *mcfp* (oligonucleotide primers oCR601 + oCR606 and pCR034 (*sacA::PspoIIQ-cfp-spoIIQ (spec)*) DNA as template), and pDR110 cut with *HindIII* and *SphI*. pDR110 [*amyE::Pspank (lacI) (spec)*] is a

double crossover vector, with an IPTG-inducible promoter, for ectopic integration at the *amyE* locus (DZR, unpublished).

**pCR286** [*ycgO::PspoIVF-spoIVFB(E44Q)Δ10-yfp (erm)*] was generated in a two-way ligation with *HindIII-XhoI* PCR product containing *spoIVFB(E44Q)Δ10* (oligonucleotide primers oDR106 + oCR619 on pKM261 DNA as template) and pKM261 cut with *HindIII-XhoI*.

**pCR287** [*ycgO::PspoIVF-spoIVFB(E44Q)Δ66-yfp (erm)*] was generated in a two-way ligation with *HindIII-XhoI* PCR product containing *spoIVFB(E44Q)Δ66* (oligonucleotide primers oDR106 + oCR620 and pKM261 DNA as template) and pKM261 cut with *HindIII-XhoI*.

**pCR288** [*ycgO::PspoIVF-spoIVFB(E44Q)Δ85-yfp (erm)*] was generated in a two-way ligation with a *HindIII-XhoI* PCR product containing *spoIVFB(E44Q)Δ85* (oligonucleotide primers oDR106 + oCR621 and pKM261 DNA as template) and pKM261 cut with *HindIII-XhoI*.

**pFR20** [*ycgO::PspoIVF-spoIVFBΔ10-yfp (erm)*] was generated in a two-way ligation with a *HindIII-XhoI* PCR product containing *spoIVFBΔ10* (oligonucleotide primers oDR106 + oCR619 and genomic DNA from PY79 as template) and pKM261 cut with *HindIII-XhoI*.

**pFR21** [*ycgO::PspoIVF-spoIVFBΔ66-yfp (erm)*] was generated in a two-way ligation with a *HindIII-XhoI* PCR product containing *spoIVFBΔ66* (oligonucleotide primers oDR106 + oCR620 and genomic DNA from PY79 as template) and pKM261 cut with *HindIII-XhoI*.

**pFR22** [*ycgO::PspoIVF-spoIVFBΔ85-yfp (erm)*] was generated in a two-way ligation with a *HindIII-XhoI* PCR product containing *spoIVFBΔ85* (oligonucleotide primers oDR106 + oCR621 and genomic DNA from PY79 as template) and pKM261 cut with *HindIII-XhoI*.

**pFR28** [*yvbJ::Phyperspank-spoIVFA (cat)*] was generated by isothermal assembly of two pieces: 1) plasmid pMS024 cut with *HindIII* and *NheI*; 2) a PCR product containing *spoIVFA* (oligonucleotide primers oFR58 + oFR59 and genomic DNA from PY79 as template). pMS024 [*yvbJ::Phyperspank (cat)*] is an ectopic integration vector harboring the *PxylA* promoter for double crossover integrations at the *yhdG* locus (M. Stanley and DZR, unpublished).

**pFR29** [*yhdG::Phyperspank-bofA (kan)*] was generated in a two-way ligation with a *SpeI-SphI* PCR product containing *bofA* (oligonucleotide primers oFR62 + oFR66 and genomic DNA from PY79 as template) and pMS036 cut with *SpeI* and *SphI*. pMS036 [*yhdG::Phyperspank (kan)*] is an ectopic integration vector harboring the *Phyperspank* promoter for double crossover integrations at the *yhdG* locus (M. Stanley and DZR, unpublished).

**pFR30** [*lacA::spoIVB(S378A) (tet)*] was generated in a two-way ligation with an *XhoI-NheI* PCR product containing *spoIVB(S378A)* (oligonucleotide primers oFR72 + oFR73 and genomic DNA

from BDR1454) and pNC018 cut with *Xho*I and *Nhe*I. pNC018 [*lacA::tet*] is an ectopic integration vector for double crossover integrations at the *lacA* locus (NC and DZR, unpublished).

**pFR31** [*ycgO::PspoIVF-spoIVFB(E44Q)Δ66-myfp (erm)*] was generated in a two-way ligation with a *Xho*I-*Bam*HI PCR product containing *myfp* (oligonucleotide primers oFR77 + oFR78 and plasmid DNA from pKM012 as template) and pCR287 cut with *Xho*I-*Bam*HI. pKM012 contains the *myfp* with codons optimized for *Bacillus subtilis* (KM and DZR, unpublished).

**pFR32** [*ycgO::PspoIVF-spoIVFBΔ66-myfp (erm)*] was generated in a two-way ligation with a *Xho*I-*Bam*HI PCR product containing *myfp* (oligonucleotide primers oFR77 + oFR78 and plasmid DNA from pKM012 as template) and pFR21 cut with *Xho*I-*Bam*HI.

**pFR36** [*ycgO::PspoIVF-spoIVFBΔ66 (erm)*] was generated in a two-way ligation with a *Hind*III-*Bam*HI PCR product containing *spoIVFBΔ66* (oligonucleotide primers oFR83 + oFR84 and genomic DNA from PY79 as template) and pKM283 cut with *Xho*I-*Bam*HI.

**pCB061** [*ycgO::PspoIVF-spoIVFB(F66A)-yfp (erm)*] was generated by site-directed mutagenesis oligonucleotide primers oCB038 + oCB039 and plasmid pKM283.

#### **Strain construction:**

**BDR3685** [*ΔspoIVB::kan*] was generated by direct transformation of *B. subtilis* PY79 with an isothermal assembly product derived from 3 PCR products: 1) a PCR product containing an upstream region of *spoIVB* amplified with oligonucleotide primers oFR48 and oFR49 and *B. subtilis* PY79 genomic DNA as template; 2) a PCR product containing the Kan cassette; 3) a PCR product containing a downstream region of *spoIVB* amplified with oligonucleotide primers oFR50 and oFR51 and *B. subtilis* PY79 genomic DNA as template.
